# Supplementary material for: Duration of SARS-CoV-2 mRNA vaccine persistence and factors associated with cardiac involvement in recently vaccinated patients
Source: PubMed Central journal article supplement (PMC10533894; doi:10.1038/s41541-023-00742-7), 2023-09-27
Supplement: 41541_2023_742_MOESM2_ESM.pdf [file 41541_2023_742_MOESM2_ESM.pdf]

**Duration of SARS-CoV-2 mRNA Vaccine Persistence  
and Factors Associated with Cardiac Involvement in Recently Vaccinated Patients**

Aram J. Krauson<sup>1</sup>, Faye Victoria C. Casimero<sup>1,2</sup>, Zakir Siddiquee<sup>1</sup>, James R. Stone<sup>1,2</sup>

<sup>1</sup>Department of Pathology, Massachusetts General Hospital, Boston, MA

<sup>2</sup>Department of Pathology, Harvard Medical School, Boston, MA

**Supplemental Information**

**Table of Contents**

Page 2: Supplementary Table 1. Characteristics of the vaccinated patients and non-vaccinated control patients

Page 3: Supplementary Table 2. Vaccine administrations

Page 4: Supplementary Table 3. Primer sets for validation of detected vaccines

Page 5: Supplementary Table 4. RT-PCR validation of vaccine-detected samples

Page 6: Supplementary Table 5. Quality control primer/probe sets

Page 7: Supplementary Figure 1. Cardiac macrophages in the patients with vaccine detected in the heart

Page 8: Supplementary Figure 2. Double-stranded DNA templates used as positive controls

Page 9: Supplementary Figure 3. Primer efficiency of selected primers

Page 10: Supplementary References

**Supplementary Table 1.** Characteristics of the vaccinated patients and non-vaccinated control patients.

| Variable                                            | Vaccinated           | Control       | P                 |
|-----------------------------------------------------|----------------------|---------------|-------------------|
| Patients (N)                                        | 20                   | 5             |                   |
| Age (years), mean $\pm$ SD                          | 64 $\pm$ 16          | 57 $\pm$ 18   | 0.44 <sup>1</sup> |
| Male, n (%)                                         | 12 (60)              | 3 (60)        | 1.00 <sup>2</sup> |
| Race                                                |                      |               | 0.07 <sup>2</sup> |
| White, n (%)                                        | 18 (90)              | 3 (60)        |                   |
| Black or African American, n (%)                    | 0 (0)                | 2 (40)        |                   |
| Unknown, n (%)                                      | 2 (10)               | 0 (0)         |                   |
| BMI (kg/m <sup>2</sup> ), mean $\pm$ SD             | 26 $\pm$ 9           | 30 $\pm$ 10   | 0.37 <sup>1</sup> |
| History of CAD, n/total (%)                         | 6/18 (33)            | 1 (20)        | 1.00 <sup>2</sup> |
| History of hypertension, n/total (%)                | 14/18 (78)           | 4 (80)        | 1.00 <sup>2</sup> |
| History of hyperlipidemia, n/total (%)              | 13/18 (72)           | 3 (60)        | 0.62 <sup>2</sup> |
| History of diabetes mellitus, n/total (%)           | 6/18 (33)            | 2 (40)        | 1.00 <sup>2</sup> |
| History of autoimmune disease, n/total (%)          | 3/18 (17)            | 0 (0)         | 1.00 <sup>2</sup> |
| Current/former smoker, n/total (%)                  | 9/18 (50)            | 2/4 (50)      | 1.00 <sup>2</sup> |
| Post-mortem interval (hours), mean $\pm$ SD         | 23 $\pm$ 11          | 30 $\pm$ 20   | 0.52 <sup>1</sup> |
| Heart weight (grams), mean $\pm$ SD                 | 469 $\pm$ 164 (n=19) | 470 $\pm$ 181 | 0.99 <sup>1</sup> |
| Left ventricular wall thickness (cm), mean $\pm$ SD | 1.3 $\pm$ 0.2        | 1.2 $\pm$ 0.3 | 0.68 <sup>1</sup> |
| Pericarditis, n (%)                                 | 3 (15)               | 1 (20)        | 1.00 <sup>2</sup> |
| Severe CAD ( $\geq$ 75% stenosis), n/total (%)      | 6/19 (32)            | 1/5 (20)      | 1.00 <sup>2</sup> |
| Any acute or recent myocardial injury, n (%)        | 11 (55)              | 1 (20)        | 0.32 <sup>2</sup> |
| Cause of Death, n (%)                               |                      |               | 0.99 <sup>3</sup> |
| Coronary artery disease                             | 4 (20)               | 1 (20)        |                   |
| Malignancy                                          | 4 (20)               | 1 (20)        |                   |
| Cardiomyopathy                                      | 3 (15)               | 1 (20)        |                   |
| Infection                                           | 3 (15)               | 1 (20)        |                   |
| Neurodegenerative disease                           | 3 (15)               | 1 (20)        |                   |
| Hemorrhage                                          | 2 (10)               | 0 (0)         |                   |
| Cirrhosis                                           | 1 (5)                | 0 (0)         |                   |

<sup>1</sup>t test.

<sup>2</sup>Fisher exact test.

<sup>3</sup>Chi-square test.

*BMI* body mass index, *CAD* coronary artery disease.

**Supplementary Table 2.** Vaccine administrations.

| Patient # | Vaccine   | Days From<br>First Dose | Days From<br>Second Dose | Days From<br>Third Dose | Days From<br>Last Dose |
|-----------|-----------|-------------------------|--------------------------|-------------------------|------------------------|
| 1         | BNT162b2  | 21                      | 1                        | N/A                     | 1                      |
| 2         | mRNA-1273 | 9                       | N/A                      | N/A                     | 9                      |
| 3         | BNT162b2  | 18                      | N/A                      | N/A                     | 18                     |
| 4         | mRNA-1273 | 22                      | N/A                      | N/A                     | 22                     |
| 5         | BNT162b2  | 26                      | N/A                      | N/A                     | 26                     |
| 6         | BNT162b2  | Unknown                 | 17                       | N/A                     | 17                     |
| 7         | BNT162b2  | 12                      | N/A                      | N/A                     | 12                     |
| 8         | BNT162b2  | 40                      | 19                       | N/A                     | 19                     |
| 9         | mRNA-1273 | 108                     | 78                       | N/A                     | 78                     |
| 10        | BNT162b2  | Unknown                 | 2                        | N/A                     | 2                      |
| 11        | BNT162b2  | 27                      | 3                        | N/A                     | 3                      |
| 12        | BNT162b2  | Unknown                 | 68                       | N/A                     | 68                     |
| 13        | BNT162b2  | 82                      | N/A                      | N/A                     | 82                     |
| 14        | mRNA-1273 | 55                      | 15                       | N/A                     | 15                     |
| 15        | BNT162b2  | 108                     | 86                       | N/A                     | 86                     |
| 16        | BNT162b2  | 178                     | 149                      | N/A                     | 149                    |
| 17        | mRNA-1273 | 182                     | 154                      | N/A                     | 154                    |
| 18        | mRNA-1273 | 173                     | 145                      | N/A                     | 145                    |
| 19        | mRNA-1273 | 284                     | 256                      | 9                       | 9                      |
| 20        | BNT162b2  | 340                     | 319                      | 38                      | 38                     |

N/A not applicable.

| <b>Supplementary Table 3. Primer sets for validation of detected vaccines.</b> |         |                          |           |
|--------------------------------------------------------------------------------|---------|--------------------------|-----------|
| Target                                                                         | Primers | Primer Sequence 5' – 3'  | NTs       |
| BNT162b2                                                                       | Forward | CAGAACACAGCTGCCTCCAG     | 60-563    |
|                                                                                | Reverse | TTCTTGAAGTTGCCCTGCTT     |           |
|                                                                                | Forward | CCAACGTGGTCATCAAAGTG     | 371-1544  |
|                                                                                | Reverse | GGAACAGCCGGTACAGGTAA     |           |
|                                                                                | Forward | GGTGCAGATCGACAGACTGA     | 2970-3650 |
|                                                                                | Reverse | CAGATGTACCAGGGCCACTT     |           |
| mRNA-1273                                                                      | Forward | CTGTTCCCTGCCCTTCTTCAGC   | 160-565   |
|                                                                                | Reverse | GGTTCTTGAAGTTGCCCTGCTTG  |           |
|                                                                                | Forward | CTGTTCCCTGCCCTTCTTCAGC   | 160-1176  |
|                                                                                | Reverse | GAAGCACAGGTCGTTTCAGCTTGG |           |

Nucleotide (NT) sequences are numbered starting at the start codon of the signal peptide sequence of each designed mRNA vaccine (Supplementary Reference 1). Annealing temperature was set at 60 °C for all sets at an elongation time of 60 seconds per 1000 bps.

| <b>Supplementary Table 4. RT-PCR validation of vaccine-detected samples.</b> |           |        |                                   |
|------------------------------------------------------------------------------|-----------|--------|-----------------------------------|
| Target                                                                       | Patient # | Tissue | NTs Sequenced                     |
| BNT162b2                                                                     | 1         | ALN    | 84 – 566; 3004 – 3620             |
|                                                                              | 5         | ALN    | 410 – 1461                        |
|                                                                              | 6         | ALN    | 2982 – 3650                       |
|                                                                              | 7         | ALN    | 416 – 1448                        |
|                                                                              | 10        | ALN    | 60 – 563; 418 – 1463; 3016 – 3641 |
|                                                                              | 11        | ALN    | 104 – 501                         |
|                                                                              | 7         | LV     | 102 – 518                         |
|                                                                              | 10        | LV     | 60 – 563; 2982 – 3641             |
|                                                                              | 8         | RV     | 105 – 563                         |
|                                                                              | 10        | RV     | 102 – 392                         |
| mRNA-1273                                                                    | 4         | ALN    | 172 – 552                         |
|                                                                              | 14        | ALN    | 208 – 579; 887 – 1119             |

Three primer sets were randomly or in combination tested with samples with detected BNT162b2, whereas two sets were tested with the two mRNA-1273 positive samples. All segments listed in the NTs sequenced column contain 400+ nucleotides outside the RT-qPCR amplicon sequence.  
*ALN* axillary lymph nodes, *LV* left ventricle, *RV* right ventricle.

| <b>Supplementary Table 5.</b> Quality control primer/probe sets. |         |                            |                   |                      |
|------------------------------------------------------------------|---------|----------------------------|-------------------|----------------------|
| Target                                                           | Primers | Primer Sequence 5' – 3'    | End Concentration | Annealing Temp. (°C) |
| ACTB                                                             | Forward | GCACAGAGCCTCGCCTTTG        | 300 nM            | 60                   |
|                                                                  | Reverse | ATCCATGGTGAGCTGGCG         |                   |                      |
| GAPDH                                                            | Forward | AGCCACATCGCTCAGACAC        | 300 nM            | 60                   |
|                                                                  | Reverse | GCCCAATACGACCAAATCC        |                   |                      |
| E Sarbeco                                                        | Forward | ACAGGTACGTTAATAGTTAATAGCGT | 400 nM            | 58 <sup>1</sup>      |
|                                                                  | Reverse | ATATTGCAGCAGTACGCACACA     | 200 nM            |                      |
|                                                                  | Probe   | ACACTAGCCATCCTTACTGCGCTTCG |                   |                      |

<sup>1</sup> Supplementary Reference 2.

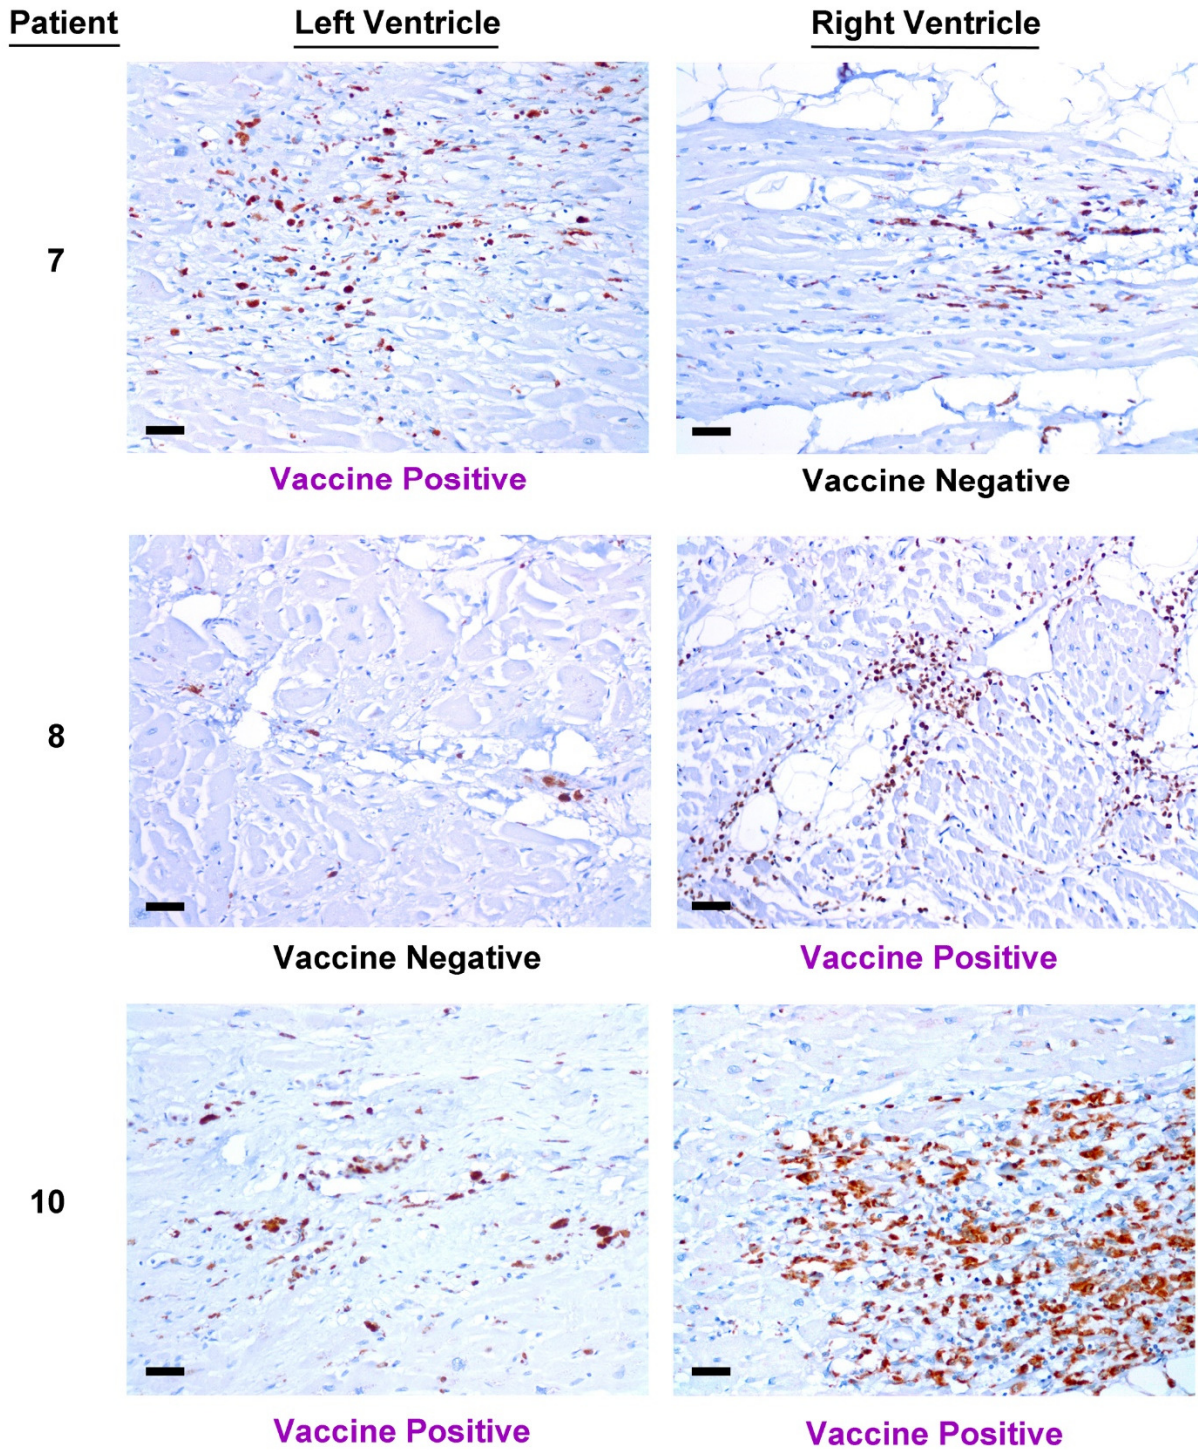

**Supplementary Figure 1. Cardiac macrophages in the patients with vaccine detected in the heart**  
 Depicted are immunohistochemical stains for the macrophage marker CD68 (brown color) in the three patients with vaccine detected in the heart for both the left ventricle (left) and right ventricle (right). Vaccine was detected by PCR in four of the six ventricles as indicated. Scale bars indicate 40 microns.

**a**

GGCATCGGAGTGACCCAGAATGTGCTGTACGAGAACCAGAAGCTGATCGCCAACCAGTTCAACAGC  
GCCATCGGCAAGATCCAGGACAGCCTGAGCAGCACAGCAAGCGCCCTGGGAAAGCTGCAGGACGT  
GGTCAACCAGAATGCCAGGCACTGAACACCCTGGTCAAGCAGCTGTCCTCCAACCTCGGGGCCAT  
CAGCTCTGTGCTGAACGATATCCTGAGCAGACTGGACCCTCCTGAGGCCGAGGTGCAGATCGACAG  
ACTGATCACAGGCAGACTGCAGAGCCTCCAGACATACGTGACCCAGCAGCTGATCAGAGCCGCCGA  
GATTAGAGCCTCTGCCAATCTGGCCGCCACCAAGATGTCTGAGTGTGTGCTGGGCCAGAGCAAGAG  
AGTGGACTTTTGCGGCAAGGGCTACCACCTGATGAGCTCCCTCAGTCTGCCCT

FWD Primer: GGTGCAGATCGACAGACTGA

REV Primer: GGAAGCTCATCAGGTGGTA

Probe: TACGTGACCCAGCAGCTGATCAGAGCC

**b**

ACAACACCTTCGTGAGCGGCAACTGCGACGTGGTGTATCGGCATCGTGAACAACACCGTGTACGATC  
CCCTGCAGCCCGAGCTGGACAGCTTCAAGGAGGAGCTGGACAAGTACTTCAAGAATCACACCAGCC  
CCGACGTGGACCTGGGCGACATCAGCGGCATCAACGCCAGCGTGGTGAACATCCAGAAGGAGATC  
GATCGGCTGAACGAGGTGGCCAAGAACCTGAACGAGAGCCTGATCGACCTGCAGGAGCTGGGCAA  
GTACGAGCAGTACATCAA

FWD Primer: AGCTGGACAGCTTCAAGGAG

REV Primer: GGCTCTCGTTCAGGTTCTTG

Probe: ACGCCAGCGTGGTGAACATCC

**Supplementary Figure 2. Double-stranded DNA templates used as positive controls for vaccine detection assays**

a. Positive control dsDNA fragment for BNT162b2 with forward and reverse primer sequences below and underlined within the fragment's sequence. The Taqman probe is listed below and highlighted in the control sequence. The vaccine's proline substitutions (in red) are included in the dsDNA control. b. The mRNA-1273 detection assay dsDNA fragment control sequence is shown with both listed primers (underlined) and probe (highlighted yellow) used.



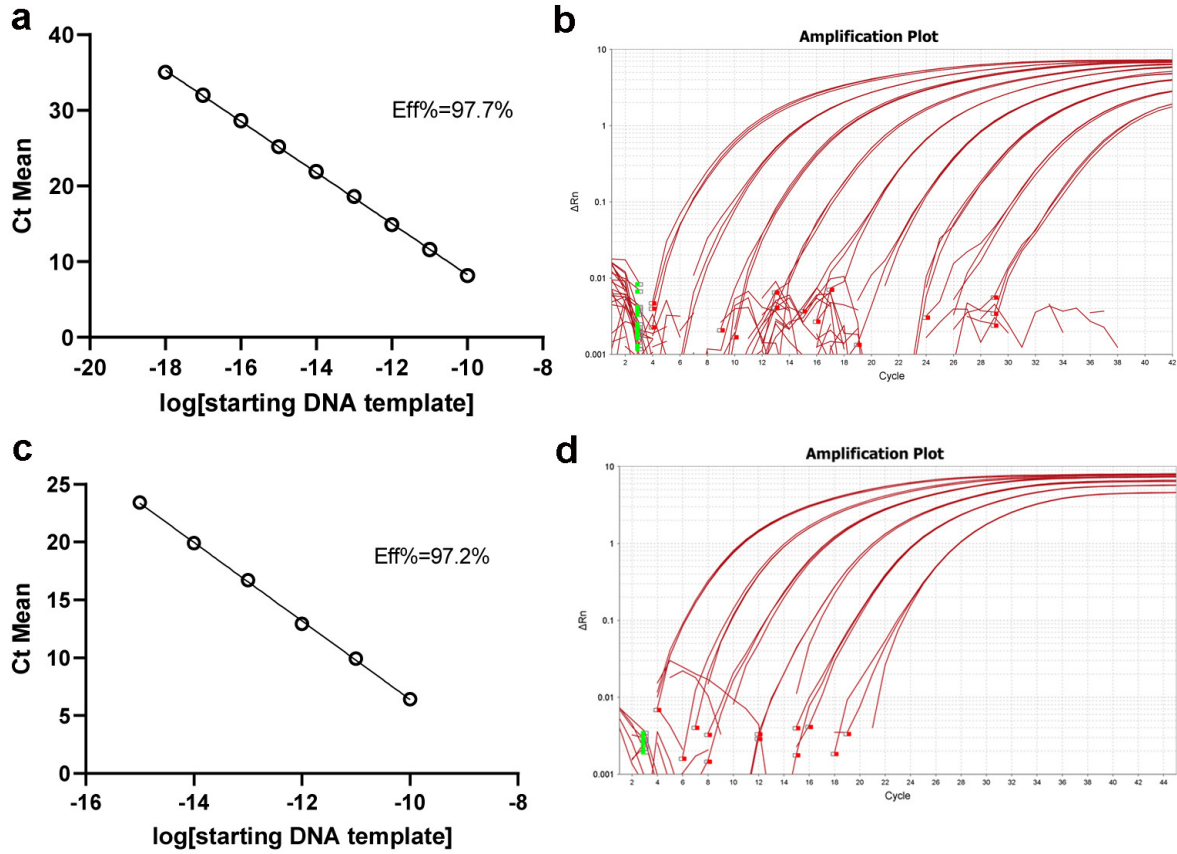

**Supplementary Figure 3. Primer efficiency for two SARS-Cov2 mRNA vaccine-detection assays**  
 The primer efficiency for each SARS-Cov2 vaccine detection assay was tested using serially diluted dsDNA fragment stocks in triplicate. a. b. Trendline outcome and amplification plot is shown for BNT162b2 vaccine RT-qPCR assay. Calculated primer efficiency is 97.7%, slope = -3.378,  $R^2 = 0.9998$ . c. d. Primer efficiency graph with trendline and amplification plot for the mRNA-1273 detection assay. The primer set had a primer efficiency of 97.2%, slope = -3.392,  $R^2 = 0.9995$ .

### Supplementary References

1. Granados-Riveron, J. T. & Aquino-Jarquin, G. Engineering of the current nucleoside-modified mRNA-LNP vaccines against SARS-CoV-2. *Biomed. Pharmacother.* **142**, 111953 (2021).
2. Rimmelink, M. et al. Unspecific post-mortem findings despite multiorgan viral spread in COVID-19 patients. *Crit. Care* **24**, 495 (2020).
